# Supplementary material for: Exposure to Environmentally Relevant Levels of PFAS Causes Metabolic Changes in the Freshwater Amphipod Austrochiltonia subtenuis
Source: MDPI journal article supplement (doi:10.3390/metabo12111135), 2022-11-18
Supplement: s1 [file s1]

# Supplementary material

**Table S1.** Water quality for amphipod PFAS exposure (PFOS, GenX and PFHxS).

|       | <b>Treatment</b> | <b>DO<br/>(%)</b> | <b>pH</b> | <b>Cond<br/>(uS/cm)</b> | <b>Temp<br/>(°C)</b> | <b>NH+<br/>(ppm)</b> |
|-------|------------------|-------------------|-----------|-------------------------|----------------------|----------------------|
| PFOS  | <i>Day 0</i>     | 96.6              | 8.25      | 1206                    | 22                   | 0                    |
|       | <i>Day 7</i>     |                   |           |                         |                      |                      |
|       | Control          | 106.6             | 8.08      | 1244                    | 20.3                 | 0                    |
|       | Low              | 108.4             | 8.26      | 1255                    | 20.8                 | 0                    |
|       | Low -Medium      | 109.6             | 8.28      | 1245                    | 21.1                 | 0                    |
|       | Medium           | 108.6             | 8.13      | 1228                    | 20.3                 | 0                    |
|       | Medium – High    | 110.4             | 8.3       | 1230                    | 21.2                 | 0                    |
|       | High             | 99                | 8.12      | 1230                    | 20.9                 | 0                    |
| GenX  | <i>Day 7</i>     |                   |           |                         |                      |                      |
|       | Control          | 87.2              | 7.88      | 1401                    | 20.1                 | 0                    |
|       | Low              | 91                | 8.13      | 1385                    | 21.7                 | 0                    |
|       | Low -Medium      | 90.2              | 8.16      | 1389                    | 20.6                 | 0                    |
|       | Medium           | 91.1              | 8.33      | 1374                    | 19.8                 | 0                    |
|       | Medium – High    | 87.6              | 8.14      | 1373                    | 19.7                 | 0                    |
|       | High             | 83.4              | 8.28      | 1460                    | 20.9                 | 0                    |
| PFHxS | <i>Day 7</i>     |                   |           |                         |                      |                      |
|       | Control          | 91.5              | 7.92      | 1290                    | 20                   | 0                    |
|       | Low              | 87.7              | 8.12      | 1280                    | 21.2                 | 0                    |
|       | Low -Medium      | 86.4              | 8.11      | 1277                    | 20.9                 | 0                    |
|       | Medium           | 88.4              | 8.16      | 1281                    | 20.4                 | 0                    |
|       | Medium – High    | 81.8              | 8.19      | 1277                    | 21.2                 | 0                    |
|       | High             | 83.2              | 8.03      | 1263                    | 20.9                 | 0                    |

**Table S2.** Total Survival of Amphipods following PFAS exposure (PFOS, GenX and PFHxS).

| <b>Treatment</b> | <b>Replicate</b> | <b>PFOS (n=20)</b> | <b>GenX (n=20)</b> | <b>PFHxS<br/>(n=15)</b> |
|------------------|------------------|--------------------|--------------------|-------------------------|
| <b>Control</b>   | <b>1</b>         | 20                 | 15                 | 15                      |
|                  | <b>2</b>         | 20                 | 7                  | 12                      |
|                  | <b>3</b>         | 20                 | 8                  | 14                      |
|                  | <b>4</b>         | 20                 | 13                 | 14                      |
|                  | <b>5</b>         | 20                 | 7                  | 13                      |
| <b>Low</b>       | <b>1</b>         | 20                 | 6                  | 12                      |
|                  | <b>2</b>         | 20                 | 8                  | 11                      |

|                     |   |    |    |    |
|---------------------|---|----|----|----|
|                     | 3 | 19 | 12 | 14 |
|                     | 4 | 16 | 8  | 12 |
|                     | 5 | 20 | 8  | 14 |
| <b>Low – Medium</b> | 1 | 17 | 10 | 10 |
|                     | 2 | 20 | 6  | 12 |
|                     | 3 | 20 | 12 | 12 |
|                     | 4 | 16 | 12 | 13 |
|                     | 5 | 15 | 7  | 13 |
| <b>Medium</b>       | 1 | 19 | 8  | 14 |
|                     | 2 | 20 | 13 | 12 |
|                     | 3 | 20 | 13 | 12 |
|                     | 4 | 20 | 13 | 14 |
|                     | 5 | 20 | 11 | 11 |
| <b>Medium -High</b> | 1 | 18 | 8  | 15 |
|                     | 2 | 20 | 12 | 11 |
|                     | 3 | 20 | 8  | 14 |
|                     | 4 | 20 | 9  | 15 |
|                     | 5 | 15 | 8  | 13 |
| <b>High</b>         | 1 | 17 | 8  | 10 |
|                     | 2 | 15 | 5  | 15 |
|                     | 3 | 13 | 10 | 11 |
|                     | 4 | 17 | 5  | 12 |
|                     | 5 | 17 | 8  | 11 |

Table S3. Retention time and M/Z of significant metabolites.

| Metabolite       | Retention Time (mins) | Mass to charge (M/z) |
|------------------|-----------------------|----------------------|
| Monostearin      | 14.30                 | 43.96                |
| Ketobutyric acid | 6.68                  | 74.98                |
| Palmitic Acid    | 11.65                 | 313.24               |
| Glycerol         | 7.92                  | 74.97                |
| Propanoic acid   | 6.62                  | 74.98                |
| Acetic acid      | 7.17                  | 74.97                |
| Valine           | 6.88                  | 74.98                |
| Cholesterol      | 17.63                 | 43.98                |
| Proline          | 9.32                  | 74.99                |

Table S4. Survival t-Test (Two-sample assuming equal variance). Degrees of freedom = 8.

| Treatment    | Control – Low | Control – Low-Medium | Control - Medium | Control – Medium -High | Control – High |
|--------------|---------------|----------------------|------------------|------------------------|----------------|
| <b>PFOS</b>  | 0.23          | 0.05                 | 0.35             | 0.19                   | 0.00           |
| <b>GenX</b>  | 0.43          | 0.78                 | 0.43             | 0.60                   | 0.19           |
| <b>PFHxS</b> | 0.24          | 0.06                 | 0.24             | 1.00                   | 0.11           |

## PFOS OPLSDA Model Overview and VIP

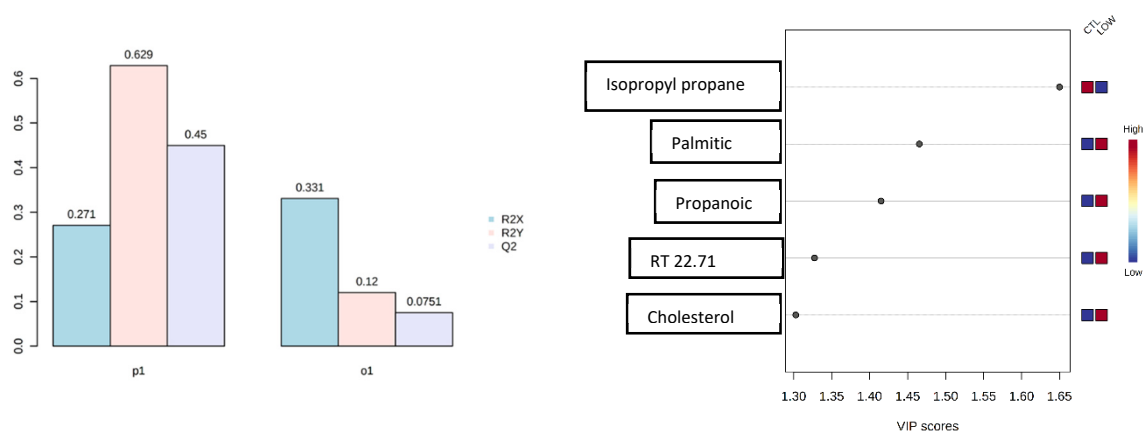

**Figure S1.** Low PFOS concentration Orthogonal Partial Least Squares - Discriminant Analysis (OPLS-DA) model overview and Variable Importance for Projection (VIP).

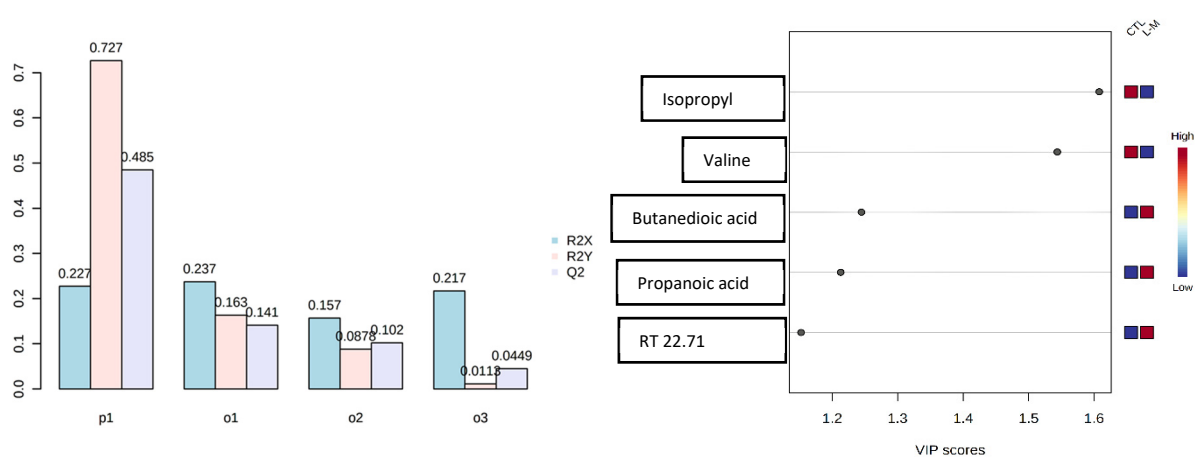

**Figure S2.** Low-medium PFOS concentration Orthogonal Partial Least Squares - Discriminant Analysis (OPLS-DA) model overview and Variable Importance for Projection (VIP).

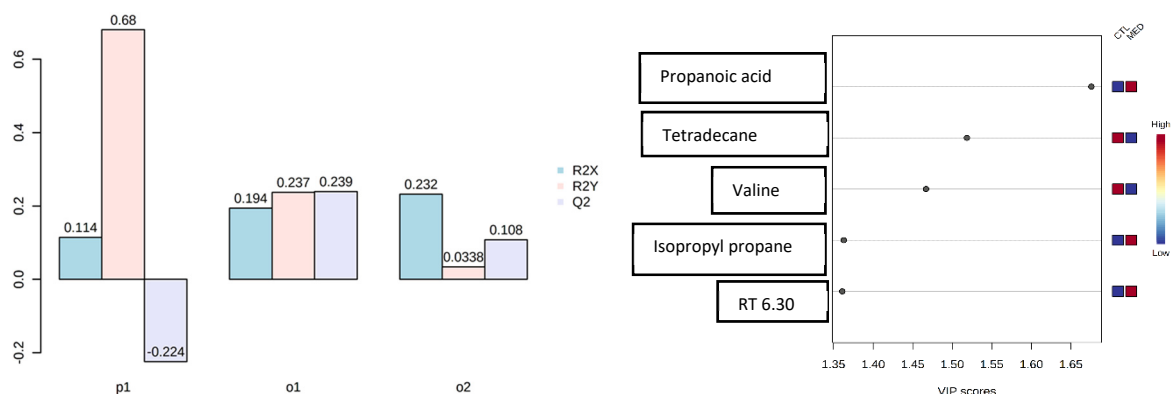

**Figure S3.** Medium PFOS concentration Orthogonal Partial Least Squares - Discriminant Analysis (OPLS-DA) model overview and Variable Importance for Projection (VIP).

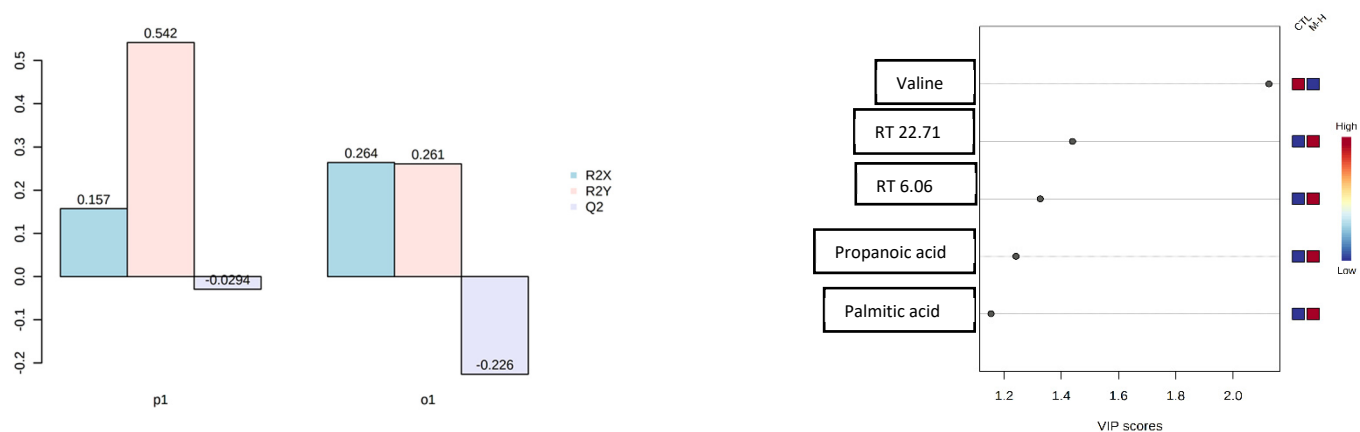

**Figure S4.** Medium – high PFOS concentration Orthogonal Partial Least Squares - Discriminant Analysis (OPLS-DA) model overview and Variable Importance for Projection (VIP).

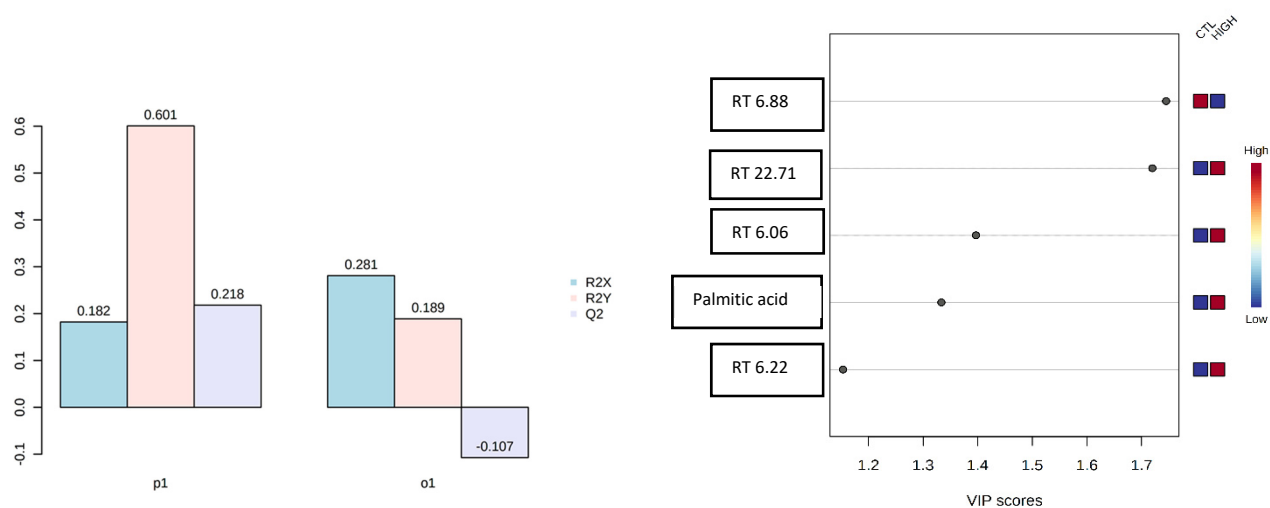

**Figure S5.** Medium – high PFOS concentration Orthogonal Partial Least Squares - Discriminant Analysis (OPLS-DA) model overview and Variable Importance for Projection (VIP).

## Box plots PFOS

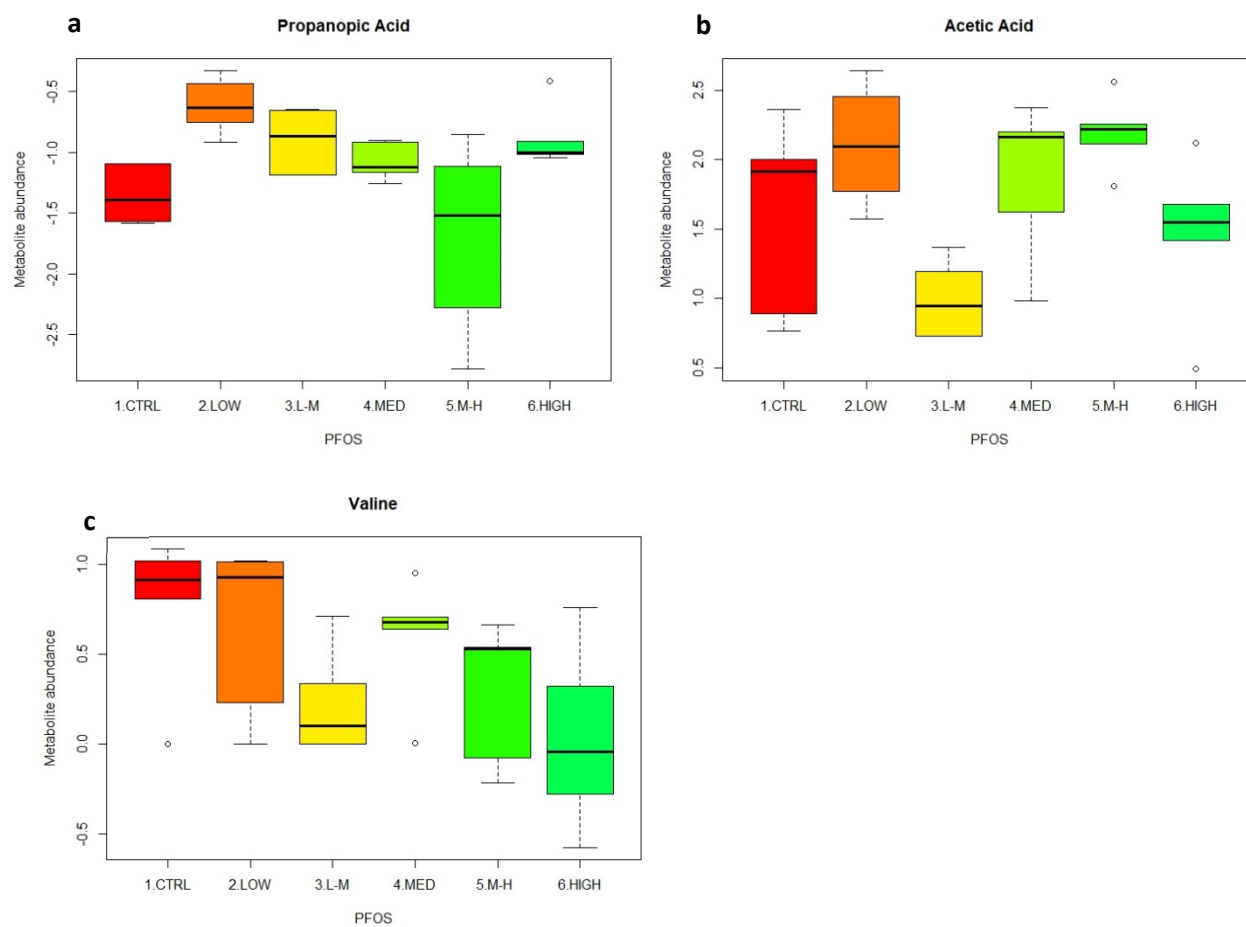

**Figure S6.** a-c). Significant metabolite features from amphipods exposed to PFOS - Low (0.04 ug/L), Low-Medium (0.20 ug/L); Medium (1.00 ug/L); Medium- High (5.00 ug/L) and High (25.00 ug/L). a) Propanoic Acid; b) Acetic Acid c) Valine.

## GenX OPLS-DA Model Overview

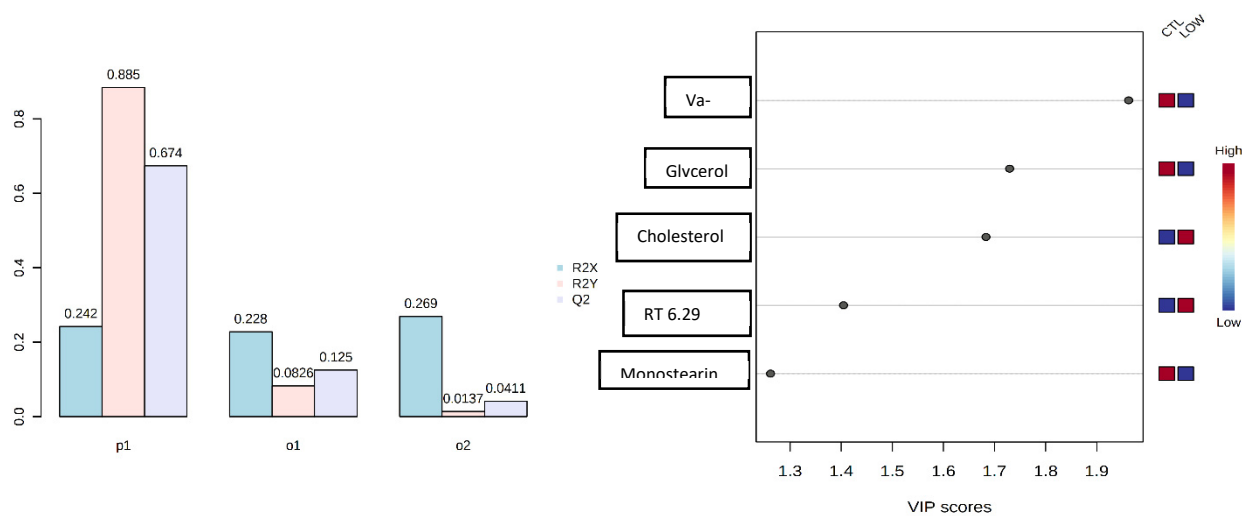

**Figure S7.** Low GenX concentration Orthogonal Partial Least Squares - Discriminant Analysis (OPLS-DA) model overview and Variable Importance for Projection (VIP).

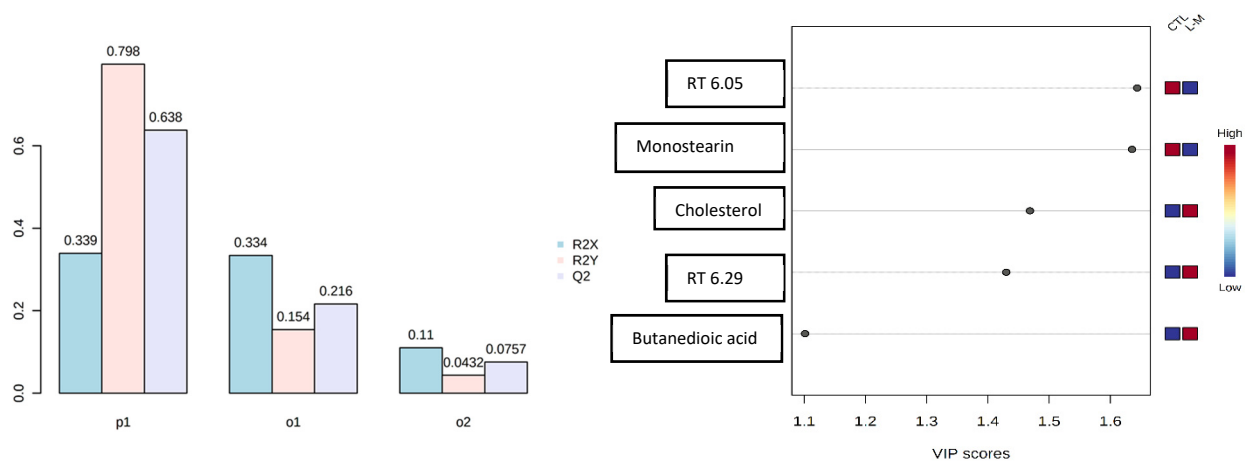

**Figure S8.** Low - medium GenX concentration Orthogonal Partial Least Squares - Discriminant Analysis (OPLS-DA) model overview and Variable Importance for Projection (VIP).

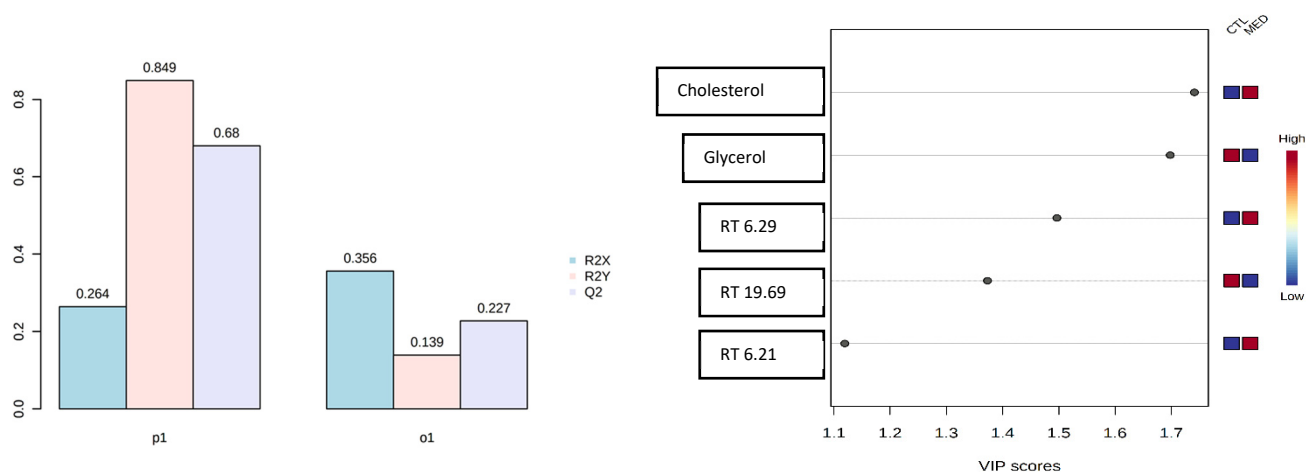

**Figure S9.** Medium GenX concentration Orthogonal Partial Least Squares - Discriminant Analysis (OPLS-DA) model overview and Variable Importance for Projection (VIP).

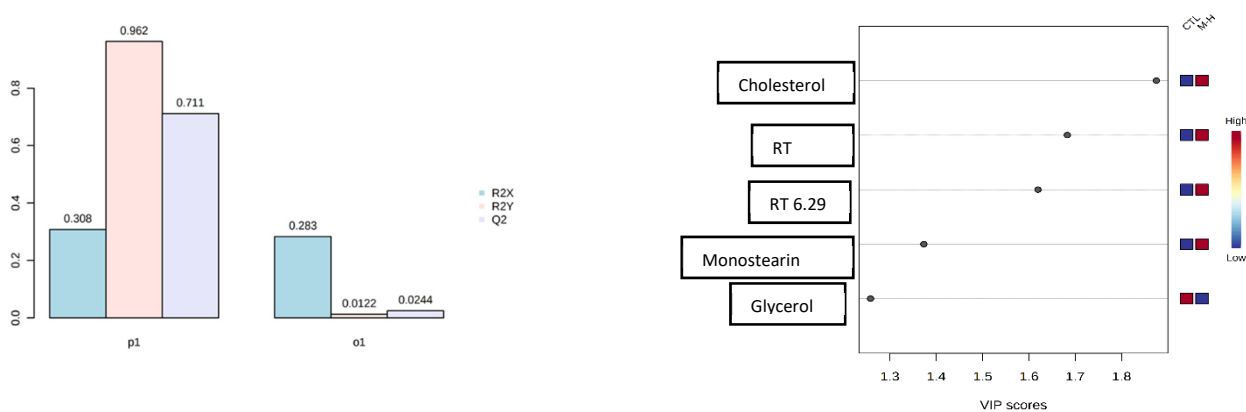

**Figure S10.** Medium- high GenX concentration Orthogonal Partial Least Squares - Discriminant Analysis (OPLS-DA) model overview and Variable Importance for Projection (VIP).

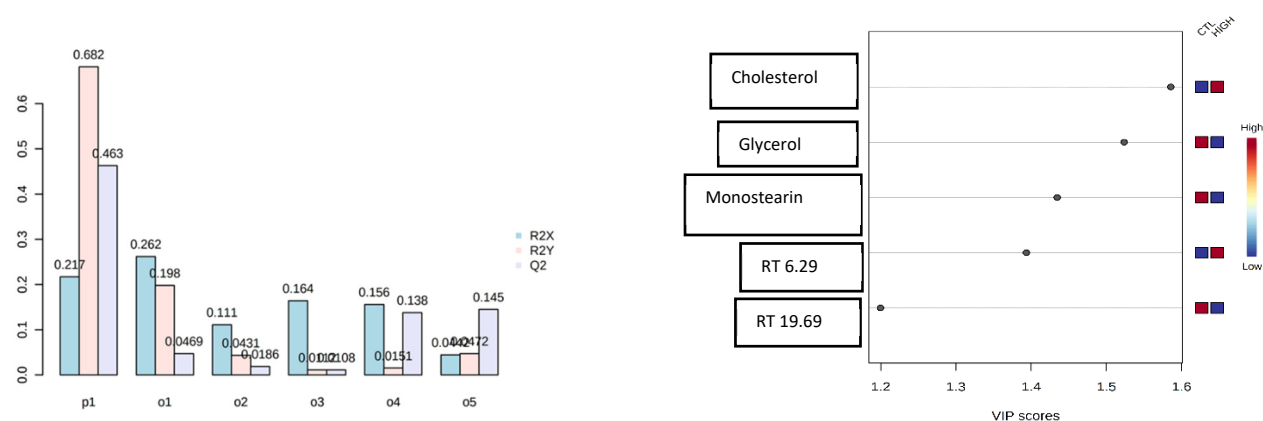

**Figure S11.** High GenX concentration Orthogonal Partial Least Squares - Discriminant Analysis (OPLS-DA) model overview and Variable Importance for Projection (VIP).

## Box plots GenX

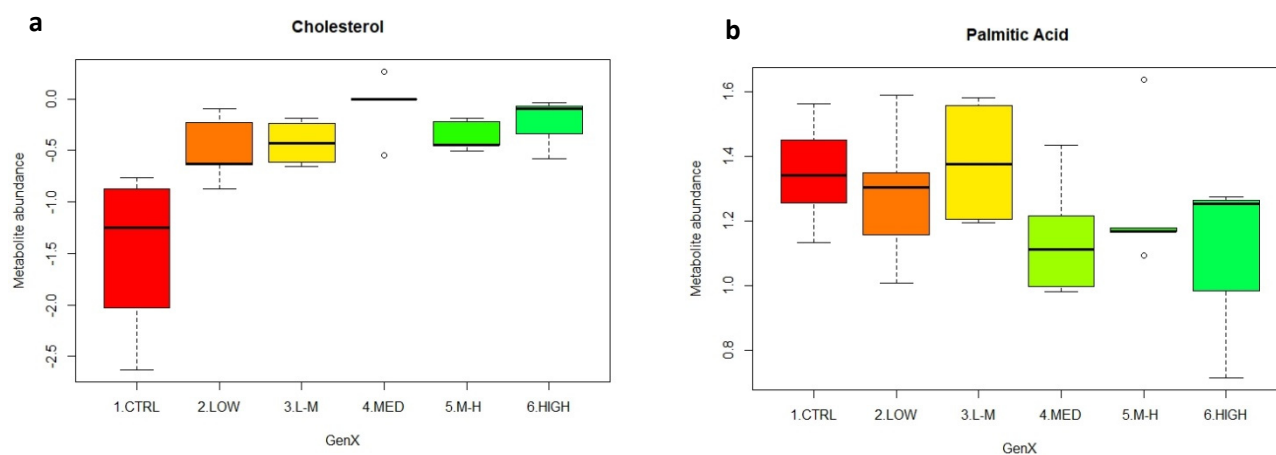

**Figure S12.** a-b) Significant metabolites from amphipods exposed to GenX Low (0.03 ug/L); Low-Medium (0.16 ug/L); Medium (0.80 ug/L); Medium- High (4.00 ug/L) and High (20.00 ug/L). a) Cholesterol and b) Palmitic acid.

## PFHxS OPLS-DA Model Overview

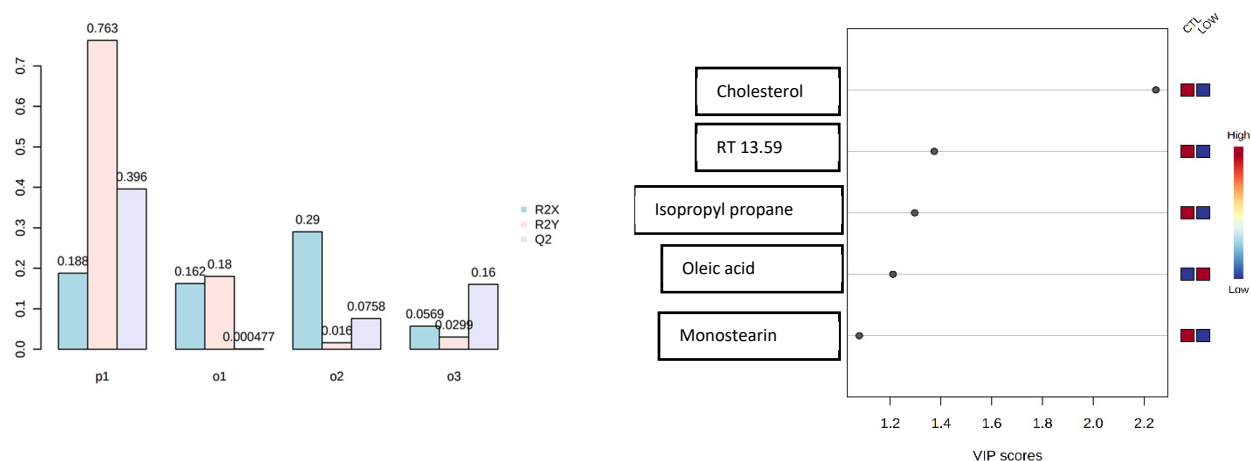

**Figure S13.** Low PFHxS concentration Orthogonal Partial Least Squares - Discriminant Analysis (OPLS-DA) model overview and Variable Importance for Projection (VIP).



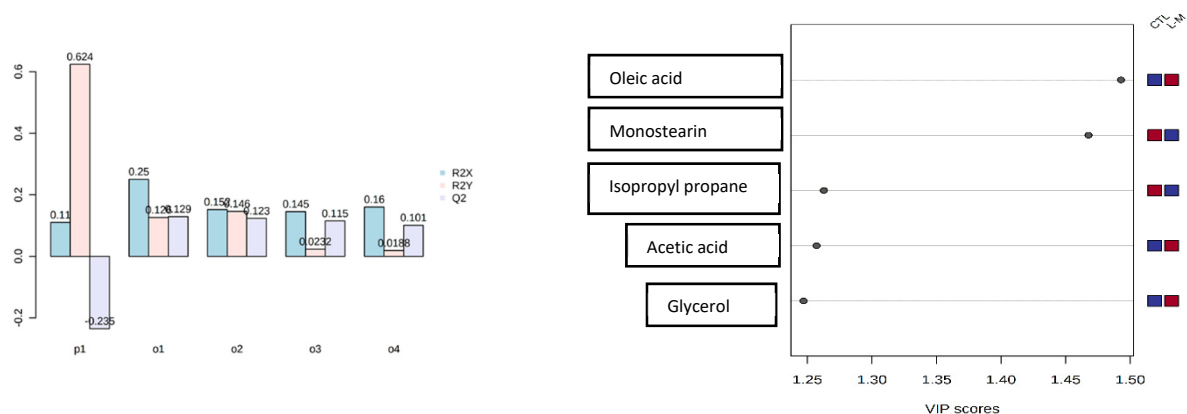

**Figure S14.** Low – medium PFHxS concentration Orthogonal Partial Least Squares - Discriminant Analysis (OPLS-DA) model overview and Variable Importance for Projection (VIP).

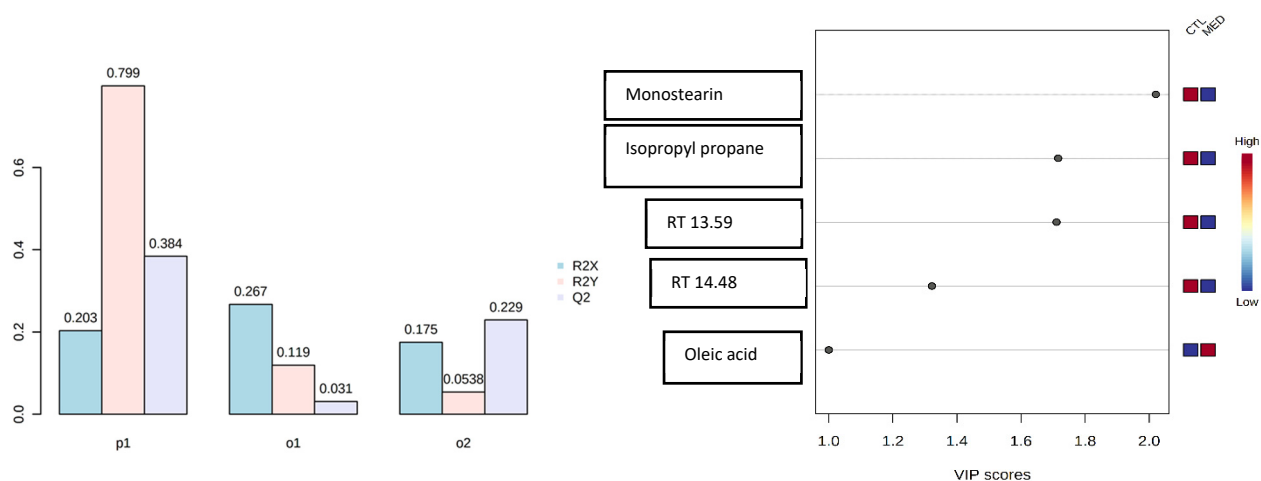

**Figure S15.** Medium PFHxS concentration Orthogonal Partial Least Squares - Discriminant Analysis (OPLS-DA) model overview and Variable Importance for Projection (VIP).

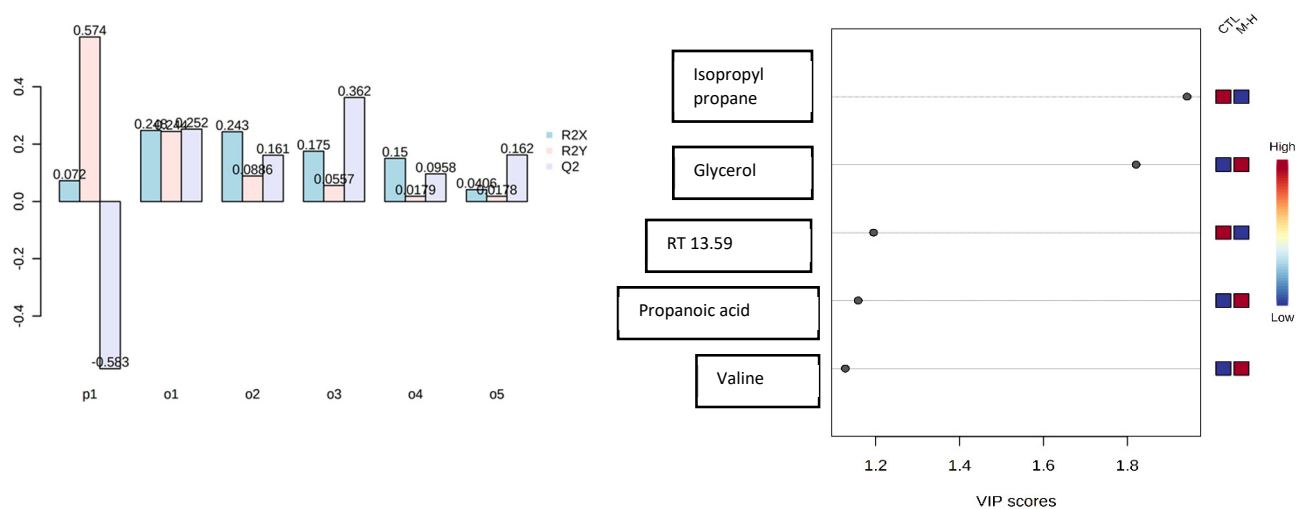

**Figure S16.** Medium- high PFHxS concentration Orthogonal Partial Least Squares - Discriminant Analysis (OPLS-DA) model overview and Variable Importance for Projection (VIP).

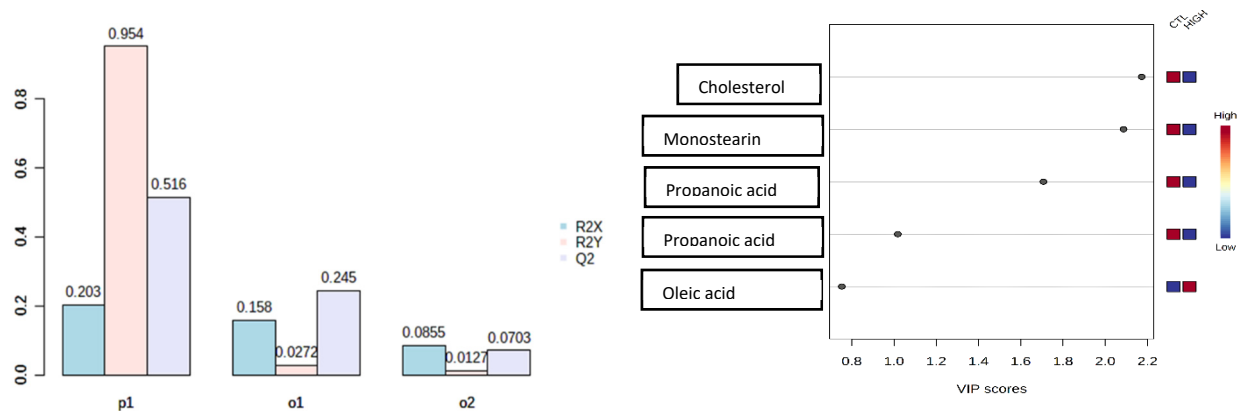

**Figure S17.** High PFHxS concentration Orthogonal Partial Least Squares - Discriminant Analysis (OPLS-DA) model overview and Variable Importance for Projection (VIP).
